# Supplementary material for: Angstrom-Scale Active Width Control of Nano Slits for Variable Plasmonic Cavity
Source: MDPI journal article supplement (doi:10.3390/nano11092463), 2021-09-21
Supplement: s1 [file s1]

**Supplementary Materials for**

**Angstrom-scale Active Width Control of Nano Slits  
for Variable Plasmonic Cavity**

Dukhyung Lee \*, Dohee Lee, Hyeong Seok Yun and Dai-Sik Kim \*

Department of Physics and Center for Atom Scale Electromagnetism, Ulsan  
National Institute of Science and Technology, Ulsan, 44919, Republic of Korea

Correspondence: hyung0624@unist.ac.kr (Du.L.); daisikkim@unist.ac.kr (D.-  
S.K.)

**Table S1. Fitting equations and residual standard deviations in Figures 2(a), 5(a), 5(c), 6(a), 6(c) and 7(a)**

| Item                                                        | Fitting equation           | Obtained slope, $\alpha$ | Residual standard deviation |
|-------------------------------------------------------------|----------------------------|--------------------------|-----------------------------|
| Figure 2(a)                                                 | $y = \alpha \cdot x + 3$   | 33.38974                 | 0.00481                     |
| Figure 5(a),<br>$h_{\text{Sub}} = 50 \text{ } \mu\text{m}$  | $y = \alpha \cdot x + 3$   | 7.09515                  | 2.18695E-4                  |
| Figure 5(a),<br>$h_{\text{Sub}} = 100 \text{ } \mu\text{m}$ | $y = \alpha \cdot x + 3$   | 13.59455                 | 6.73019E-4                  |
| Figure 5(a),<br>$h_{\text{Sub}} = 150 \text{ } \mu\text{m}$ | $y = \alpha \cdot x + 3$   | 20.19799                 | 0.00177                     |
| Figure 5(a),<br>$h_{\text{Sub}} = 200 \text{ } \mu\text{m}$ | $y = \alpha \cdot x + 3$   | 26.80505                 | 0.00267                     |
| Figure 5(a),<br>$h_{\text{Sub}} = 250 \text{ } \mu\text{m}$ | $y = \alpha \cdot x + 3$   | 33.38974                 | 0.00481                     |
| Figure 5(c)                                                 | $y = \alpha \cdot x$       | 0.1342                   | 0.22931                     |
| Figure 6(a),<br>$p = 100 \text{ nm}$                        | $y = \alpha \cdot x + 3$   | 7.00607                  | 9.94147E-4                  |
| Figure 6(a),<br>$p = 200 \text{ nm}$                        | $y = \alpha \cdot x + 3$   | 13.86091                 | 0.002                       |
| Figure 6(a),<br>$p = 300 \text{ nm}$                        | $y = \alpha \cdot x + 3$   | 20.55871                 | 0.00297                     |
| Figure 6(a),<br>$p = 400 \text{ nm}$                        | $y = \alpha \cdot x + 3$   | 27.05957                 | 0.0039                      |
| Figure 6(a),<br>$p = 500 \text{ nm}$                        | $y = \alpha \cdot x + 3$   | 33.38974                 | 0.00481                     |
| Figure 6(c)                                                 | $y = \alpha \cdot x$       | 0.06756                  | 0.32494                     |
| Figure 7(a),<br>$w_0 = 0.5 \text{ nm}$                      | $y = \alpha \cdot x + 0.5$ | 32.69383                 | 0.00471                     |
| Figure 7(a),<br>$w_0 = 3 \text{ nm}$                        | $y = \alpha \cdot x + 3$   | 33.38974                 | 0.00481                     |
